# Supplementary material for: Structure-based design and synthesis of copper(ii) complexes as antivirus drug candidates targeting SARS CoV-2 and HIV
Source: Royal Society of Chemistry journal article supplement (doi:10.1039/d2nj00703g), 2022-01-01
Supplement: d2nj00703g1.pdf [file d2nj00703g1.pdf]

ARTICLE

**Supporting Information for  
Structure-based design and synthesis of copper (II) complexes as  
antivirus drug candidates targeting the SARS CoV-2 and HIV**

Sunil Kumar<sup>a</sup>, and Mukesh Choudhary<sup>a\*</sup>

---

<sup>a</sup> Department of Chemistry, National Institute of Technology Patna, Patna-800005  
(Bihar) India.

<sup>a</sup> \*Corresponding author: [mukesh@nitp.ac.in](mailto:mukesh@nitp.ac.in)

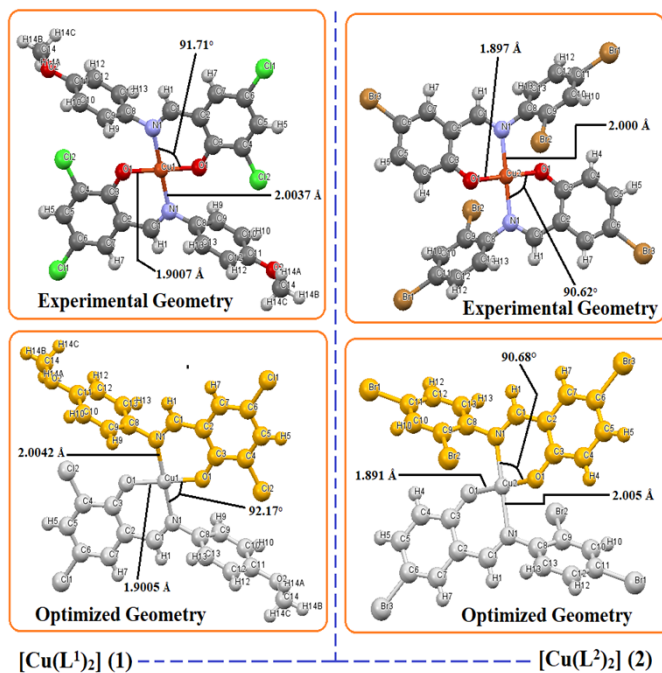

**Figure S1.** The experimental and quantum chemically optimized geometries of copper(II) complex  $[\text{Cu}(\text{L}^1)_2]$  (1) and  $[\text{Cu}(\text{L}^2)_2]$  (2).

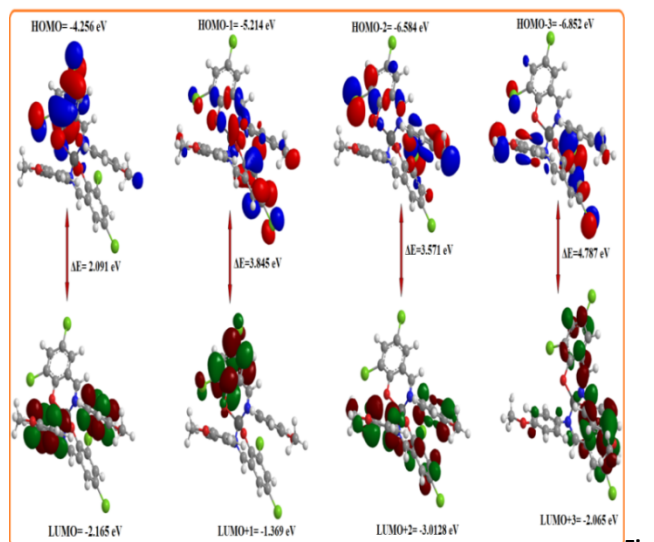

**Figure S2.** HOMO-LUMO energies and energy gap of copper(II) complex  $[\text{Cu}(\text{L}^1)_2]$  (1).

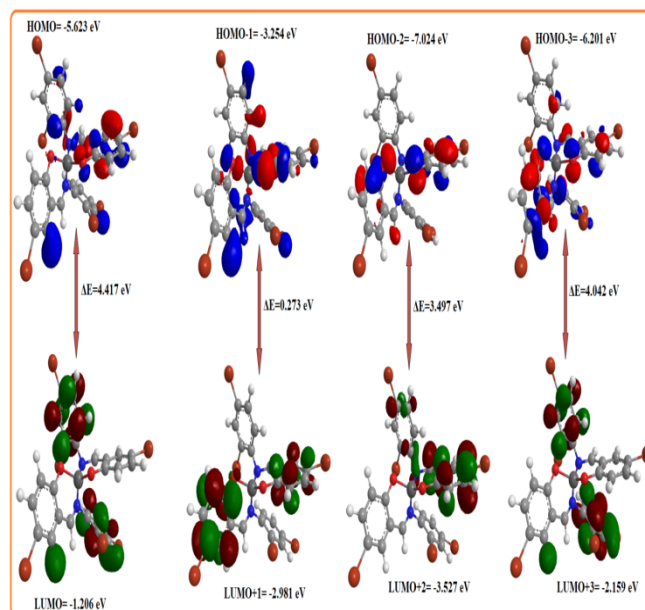

**Figure S3.** HOMO-LUMO energies and energy gap of copper(II) complex  $[\text{Cu}(\text{L}^2)_2]$  (2).

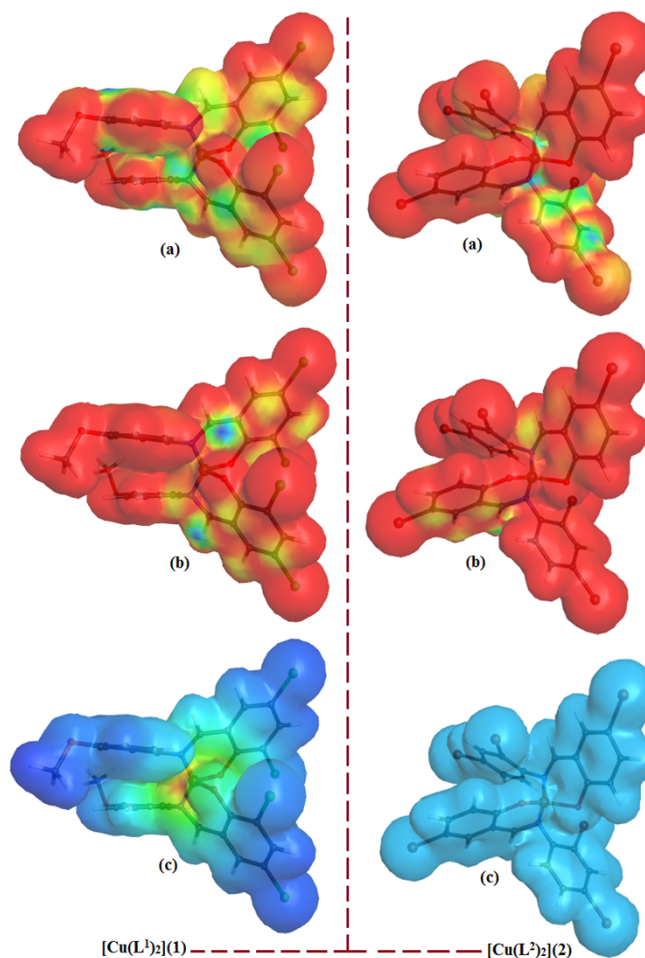

**Figure S4.** MEPs presentation including (a) radical frontier density, (b) electrophilic and nucleophilic frontier density (c) surface density for copper(II) complex  $[\text{Cu}(\text{L}^1)_2]$  (1) and  $[\text{Cu}(\text{L}^2)_2]$  (2).

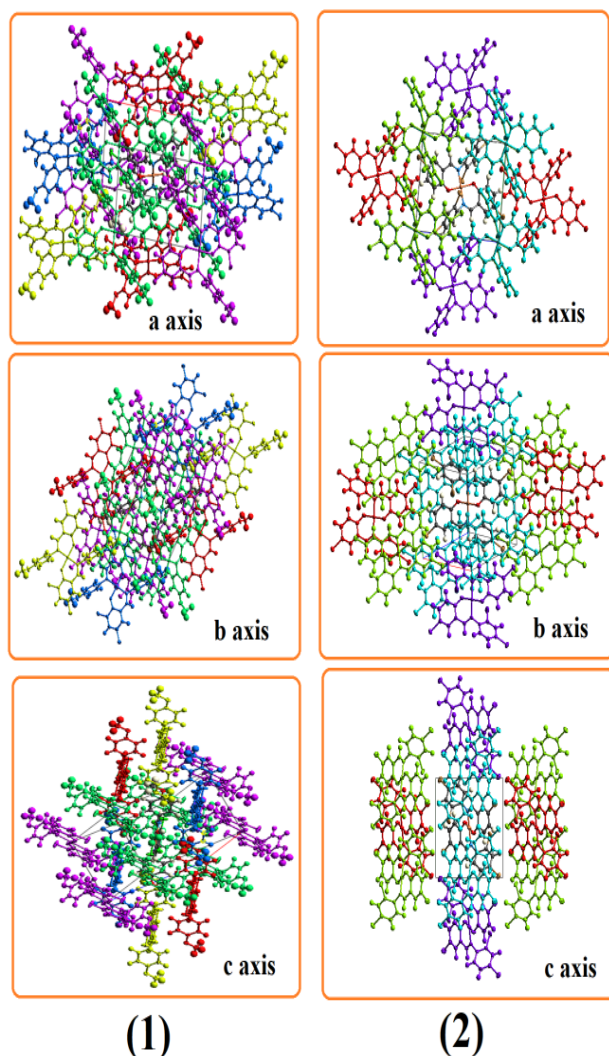

**Figure S5.** Packing cell diagrams mapped with energy framework for complex  $[\text{Cu}(\text{L}^1)_2](1)$  and complex  $[\text{Cu}(\text{L}^2)_2](2)$  viewed down the a-c axis.

| $[\text{Cu}(\text{L}^1)_2](1)$ |   |                         |       |                  |       |       |       |       |       |
|--------------------------------|---|-------------------------|-------|------------------|-------|-------|-------|-------|-------|
|                                | N | Symp                    | R     | Electron Density | E_ele | E_pol | E_dis | E_rep | E_tot |
|                                | 2 | x, y, z                 | 9.28  | HF/3-21G         | -9.0  | 0.0   | -54.5 | 21.8  | -40.6 |
|                                | 2 | x, y, z                 | 15.54 | HF/3-21G         | 0.0   | -1.9  | 0.0   | 0.0   | -1.2  |
|                                | 4 | $-x+1/2, y+1/2, -z+1/2$ | 8.42  | HF/3-21G         | -31.3 | -8.0  | -73.2 | 46.6  | -65.2 |
|                                | 2 | x, y, z                 | 12.46 | HF/3-21G         | 0.0   | -1.6  | 0.0   | 0.0   | -1.0  |
|                                | 4 | $-x+1/2, y+1/2, -z+1/2$ | 11.39 | HF/3-21G         | -4.1  | 0.0   | -14.2 | 3.7   | -13.9 |

  

| Energy Model                                     | k_ele | k_pol | k_disp | k_rep |
|--------------------------------------------------|-------|-------|--------|-------|
| CE-HF ... HF/3-21G electron densities            | 1.019 | 0.651 | 0.901  | 0.811 |
| CE-B3LYP ... B3LYP/6-31G(d,p) electron densities | 1.057 | 0.740 | 0.871  | 0.618 |

  

| $[\text{Cu}(\text{L}^2)_2](2)$ |   |                     |       |                  |       |       |       |       |       |
|--------------------------------|---|---------------------|-------|------------------|-------|-------|-------|-------|-------|
|                                | N | Symp                | R     | Electron Density | E_ele | E_pol | E_dis | E_rep | E_tot |
|                                | 2 | x, y, z             | 14.14 | HF/3-21G         | 0.0   | -0.4  | 0.0   | 0.0   | -0.3  |
|                                | 4 | $-x, y+1/2, -z+1/2$ | 11.91 | HF/3-21G         | -6.2  | -1.2  | -31.4 | 24.6  | -15.4 |
|                                | 4 | $-x, y+1/2, -z+1/2$ | 8.35  | HF/3-21G         | -25.2 | -5.9  | -78.8 | 45.9  | -63.3 |
|                                | 2 | x, y, z             | 10.98 | HF/3-21G         | 10.5  | -4.4  | -31.4 | 11.1  | -11.5 |

  

| Energy Model                                     | k_ele | k_pol | k_disp | k_rep |
|--------------------------------------------------|-------|-------|--------|-------|
| CE-HF ... HF/3-21G electron densities            | 1.019 | 0.651 | 0.901  | 0.811 |
| CE-B3LYP ... B3LYP/6-31G(d,p) electron densities | 1.057 | 0.740 | 0.871  | 0.618 |

**Figure S6** CE-B3LYP estimates of energy components and total energies (kJ/mol) for the closest intermolecular interactions in the complex  $[\text{Cu}(\text{L}^1)_2](1)$  and complex  $[\text{Cu}(\text{L}^2)_2](2)$ .

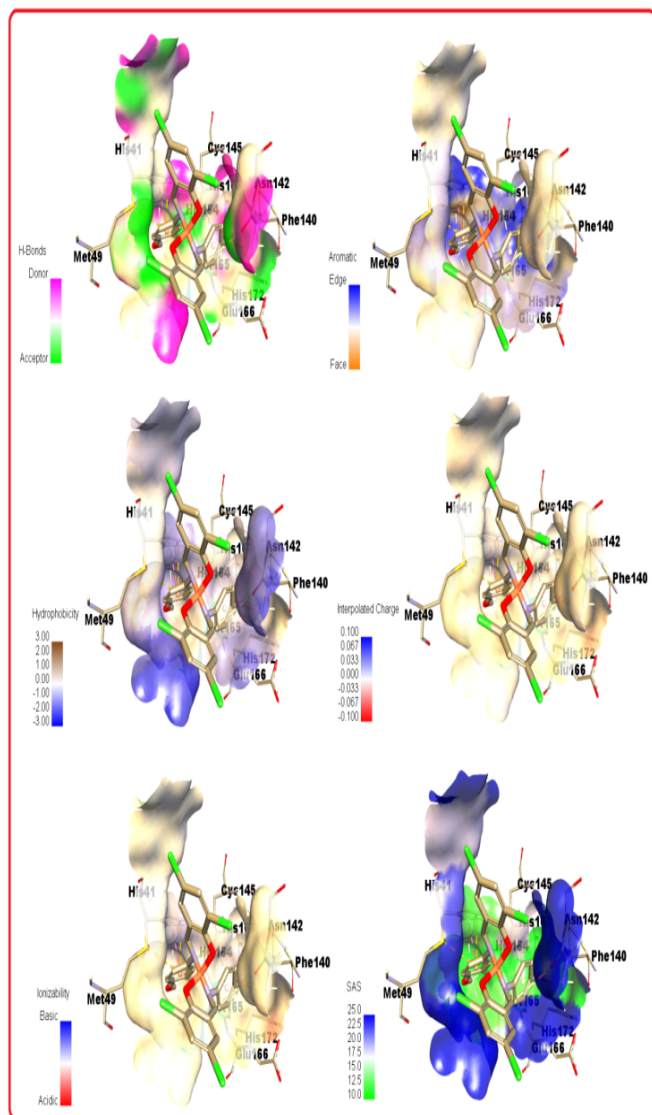

**Figure S7.** The representation of docked copper (II) complex  $[\text{Cu}(\text{L}^1)_2](1)$  with SARS-CoV-2 main protease for COVID-19 (PDB ID: 6XBG) with an inhibitor UAW246 with its focused view for interacting residues along with H-bond and intermolecular interactions; (a) H-bond donor and acceptor meshes represented by pink and light green colours, respectively; (b) Aromatic receptor surface represented by blue (Edge) and light orange (face) colours; (c) Hydrophobic pocket represented with blue and brown colours; (d) interpolated charge receptor surface represented by blue and red colours; (e) ionizability receptor surface represented by blue (basic) and red (acidic) colours; (f) SAS receptor surface represented by blue and light green colours, respectively.

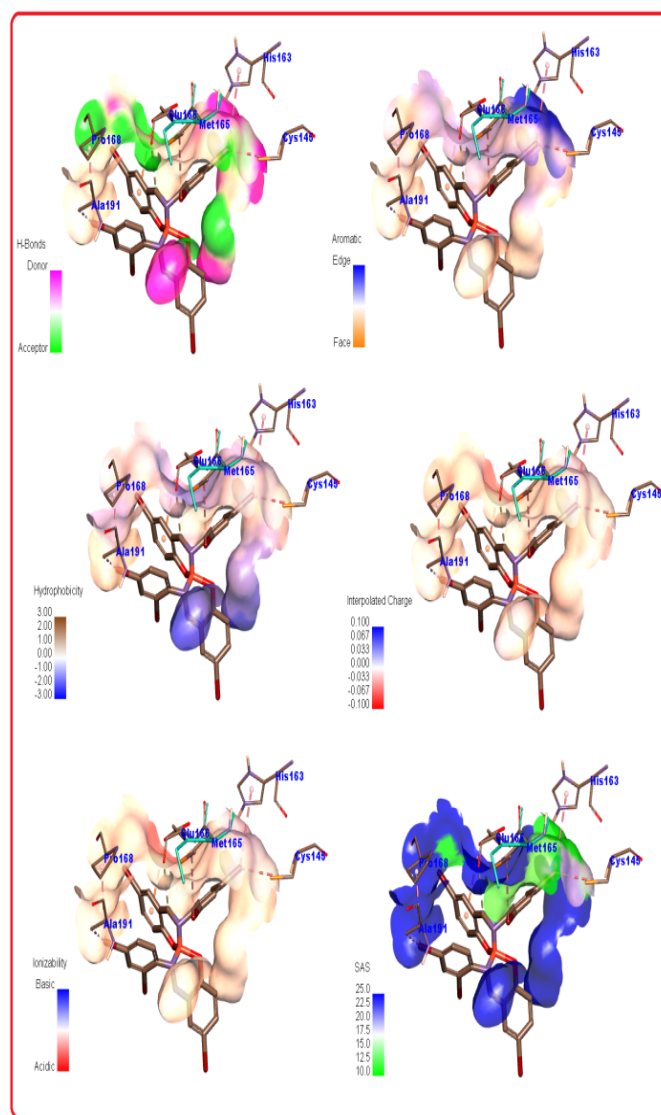

**Figure S8.** The representation of docked copper (II) complex  $[\text{Cu}(\text{L}^2)_2](2)$  with SARS-CoV-2 main protease for COVID-19 (PDB ID: 6XBG) with an inhibitor UAW246 with its focused view for interacting residues along with H-bond and intermolecular interactions; (a) H-bond donor and acceptor meshes represented by pink and light green colours, respectively; (b) Aromatic receptor surface represented by blue (Edge) and light orange (face) colours; (c) Hydrophobic pocket represented with blue and brown colours; (d) interpolated charge receptor surface represented by blue and brown colours; (e) ionizability receptor surface represented by light blue (basic) and light red (acidic) colours; (f) SAS receptor surface represented by blue and light green colours, respectively.

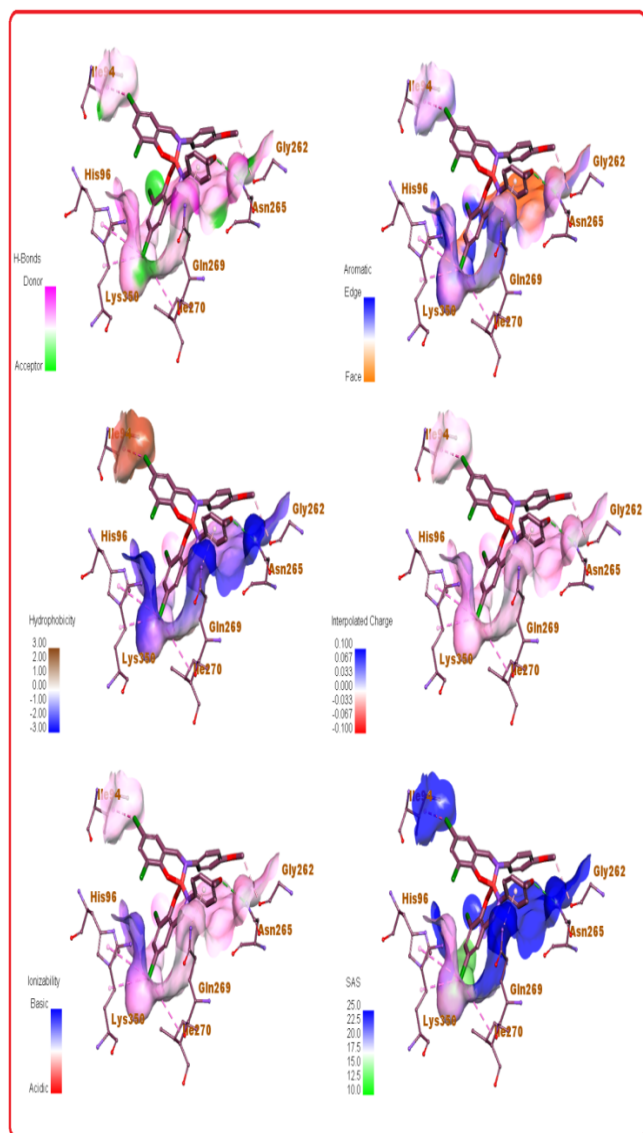

**Figure S9.** The representation of docked copper (II) complex  $[\text{Cu}(\text{L}^1)_2](1)$  inside the HIV-1 virus (PDB ID: 1JLE) with its focused view for interacting residues along with H-bond and intermolecular interactions; (a) H-bond donor and acceptor meshes represented by pink and light green colours, respectively; (b) Aromatic receptor surface represented by blue (Edge) and light orange (face) colours; (c) Hydrophobic pocket represented with blue and light brown colours; (d) interpolated charge receptor surface represented by pinkish blue and light red colours; (e) ionizability receptor surface represented by light blue (basic) and light red (acidic) colours; (f) SAS receptor surface represented by deep blue and light green colours, respectively.

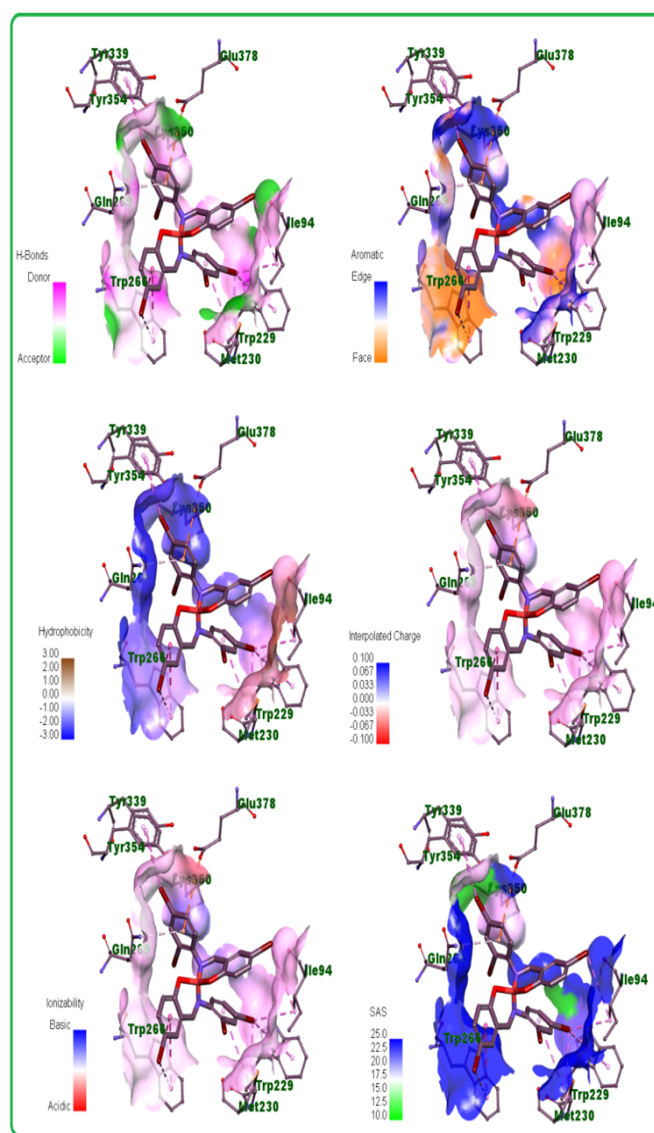

**Figure S10.** The representation of docked copper (II) complex  $[\text{Cu}(\text{L}^2)_2](2)$  inside the HIV-1 virus (PDB ID: 1JLE) with its focused view for interacting residues along with H-bond and intermolecular interactions; (a) H-bond donor and acceptor meshes represented by pink and light green colors, respectively; (b) Aromatic receptor surface represented by blue (Edge) and light orange (face) colors; (c) Hydrophobic pocket represented with blue and light brown colors; (d) interpolated charge receptor surface represented by light blue and light red colors; (e) ionizability receptor surface represented by light blue (basic) and light red (acidic) colors; (f) SAS receptor surface represented by deep blue and light green colors, respectively.

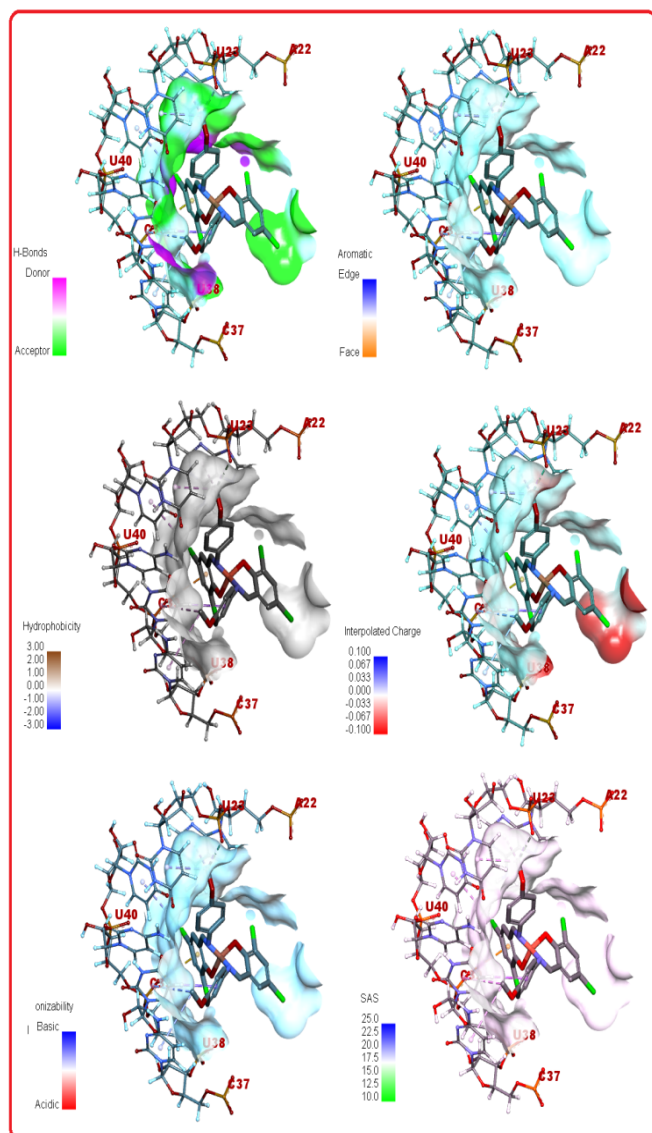

**Figure S11.** The representation of docked copper (II) complex  $[Cu(L^1)_2](1)$  inside the HIV-1 RNA virus (PDB ID: 1UUD) with its focused view for interacting residues along with H-bond and intermolecular interactions; (a) H-bond donor and acceptor meshes represented by pink and light green colours, respectively; (b) Aromatic receptor surface represented by cyanic blue (Edge) and light orange (face) colours; (c) Hydrophobic pocket represented with light blue and brown colours; (d) interpolated charge receptor surface represented by blue and red colours; (e) ionizability receptor surface represented by blue (basic) and red (acidic) colours; (f) SAS receptor surface represented by blue and light green colours, respectively.

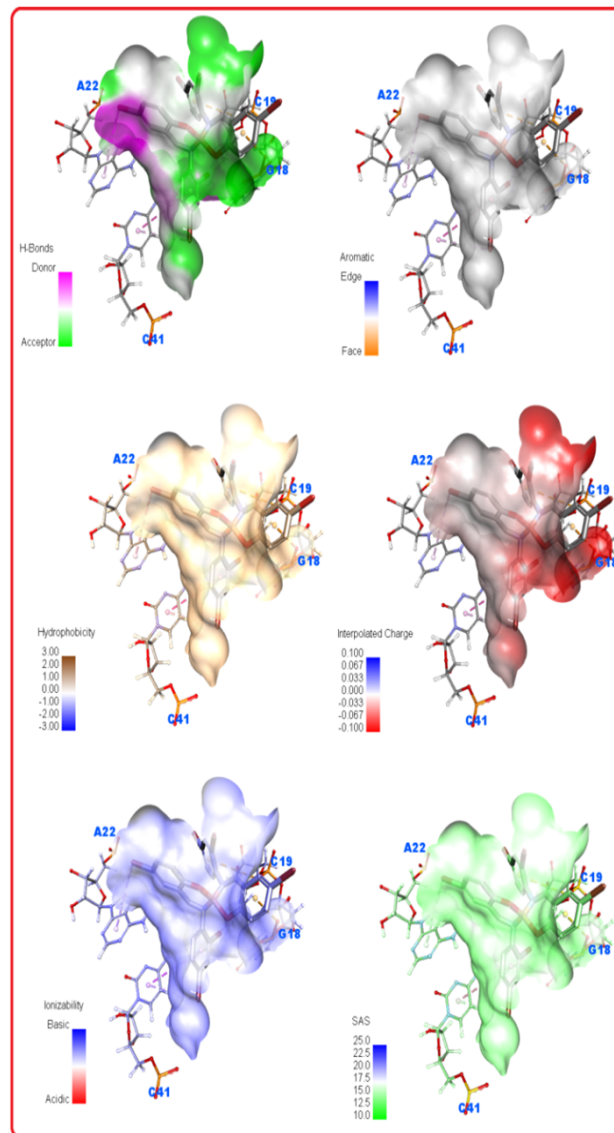

**Figure S12.** The representation of docked copper (II) complex  $[Cu(L^2)_2](2)$  inside the HIV-1 RNA virus (PDB ID: 1UUD) with its focused view for interacting residues along with H-bond and intermolecular interactions; (a) H-bond donor and acceptor meshes represented by pink and light green colours, respectively; (b) Aromatic receptor surface represented by blue (Edge) and orange (face) colours; (c) Hydrophobic pocket represented with light blue and light brown colours; (d) interpolated charge receptor surface represented by light blue and red colours; (e) ionizability receptor surface represented by light blue (basic) and red (acidic) colours; (f) SAS receptor surface represented by blue and light green colours, respectively.

**Table S1.** Experimental and optimized values of the studied complex copper complex  $[\text{Cu}(\text{L}^1)_2](\mathbf{1})$  and  $[\text{Cu}(\text{L}^2)_2](\mathbf{2})$ .

| Complexes | Experimental bond lengths (Å) |        | Theoretical bond lengths (Å) |        |
|-----------|-------------------------------|--------|------------------------------|--------|
| (1)       | Cu(1)-O(1)                    | 1.9007 | Cu(1)-O(1)                   | 1.9005 |
|           | Cu(1)-N(1)                    | 2.0037 | Cu(1)-N(1)                   | 2.0042 |
|           | Cl(1)-C(6)                    | 1.7395 | Cl(1)-C(6)                   | 1.7394 |
|           | Cl(2)-C(4)                    | 1.7207 | Cl(2)-C(4)                   | 1.7209 |
| (2)       | Cu(2)-O(1)                    | 1.897  | Cu(2)-O(1)                   | 1.891  |
|           | Cu(2)-N(1)                    | 2.000  | Cu(2)-N(1)                   | 2.005  |
|           | Br(3)-C(6)                    | 1.898  | Br(3)-C(6)                   | 1.897  |
|           | Br(2)-C(9)                    | 1.889  | Br(2)-C(9)                   | 1.890  |

**Table S2.** The structure activity relationship established between the structures of the copper complex  $[\text{Cu}(\text{L}^1)_2](\mathbf{1})$  and  $[\text{Cu}(\text{L}^2)_2](\mathbf{2})$  and their potential applications against SARS-CoV-2 main protease ( $\text{M}^{\text{pro}}$ ) and HIV inhibitors.

| Complexes  |      | Experimental bond lengths (Å) |            | Docked complex inside SARS-CoV-2 bond lengths (Å) |            | Docked complex inside HIV-1 bond lengths (Å) |        |
|------------|------|-------------------------------|------------|---------------------------------------------------|------------|----------------------------------------------|--------|
|            |      |                               |            |                                                   |            |                                              |        |
| (1)        | 6XBG | Cu(1)-O(1)                    | 1.9007     | Cu(1)-O(1)                                        | 1.9015     | Cu(1)-O(1)                                   | 1.9018 |
|            |      | Cu(1)-N(1)                    | 2.0037     | Cu(1)-N(1)                                        | 2.0027     | Cu(1)-N(1)                                   | 2.0034 |
|            |      | Cl(1)-C(6)                    | 1.7395     | Cl(1)-C(6)                                        | 1.7389     | Cl(1)-C(6)                                   | 1.7387 |
|            |      | Cl(2)-C(4)                    | 1.7207     | Cl(2)-C(4)                                        | 1.7219     | Cl(2)-C(4)                                   | 1.7213 |
|            | 1JLE | Cu(1)-O(1)                    | 1.9007     | Cu(1)-O(1)                                        | 1.9013     | Cu(1)-O(1)                                   | 1.9011 |
|            |      | Cu(1)-N(1)                    | 2.0037     | Cu(1)-N(1)                                        | 2.0032     | Cu(1)-N(1)                                   | 2.0044 |
|            |      | Cl(1)-C(6)                    | 1.7395     | Cl(1)-C(6)                                        | 1.7384     | Cl(1)-C(6)                                   | 1.7405 |
|            |      | Cl(2)-C(4)                    | 1.7207     | Cl(2)-C(4)                                        | 1.7215     | Cl(2)-C(4)                                   | 1.7213 |
|            | 1UUD | Cu(1)-O(1)                    | 1.9007     | Cu(1)-O(1)                                        | 1.9021     | Cu(1)-O(1)                                   | 1.9012 |
| Cu(1)-N(1) |      | 2.0037                        | Cu(1)-N(1) | 2.0029                                            | Cu(1)-N(1) | 2.0049                                       |        |
| Cl(1)-C(6) |      | 1.7395                        | Cl(1)-C(6) | 1.7388                                            | Cl(1)-C(6) | 1.7409                                       |        |
| Cl(2)-C(4) |      | 1.7207                        | Cl(2)-C(4) | 1.7216                                            | Cl(2)-C(4) | 1.7211                                       |        |
|            |      |                               |            |                                                   |            |                                              |        |
| (2)        | 6XBG | Cu(2)-O(1)                    | 1.897      | Cu(2)-O(1)                                        | 1.889      | Cu(2)-O(1)                                   | 1.896  |
|            |      | Cu(2)-N(1)                    | 2.000      | Cu(2)-N(1)                                        | 2.008      | Cu(2)-N(1)                                   | 2.006  |
|            |      | Br(3)-C(6)                    | 1.898      | Br(3)-C(6)                                        | 1.891      | Br(3)-C(6)                                   | 1.896  |
|            |      | Br(2)-C(9)                    | 1.889      | Br(2)-C(9)                                        | 1.894      | Br(2)-C(9)                                   | 1.897  |
|            |      |                               |            |                                                   |            |                                              |        |
|            | 1JLE | Cu(2)-O(1)                    | 1.897      | Cu(2)-O(1)                                        | 1.898      | Cu(2)-O(1)                                   | 1.891  |
|            |      | Cu(2)-N(1)                    | 2.000      | Cu(2)-N(1)                                        | 2.007      | Cu(2)-N(1)                                   | 2.004  |
|            |      | Br(3)-C(6)                    | 1.898      | Br(3)-C(6)                                        | 1.887      | Br(3)-C(6)                                   | 1.902  |
|            |      | Br(2)-C(9)                    | 1.889      | Br(2)-C(9)                                        | 1.891      | Br(2)-C(9)                                   | 1.887  |
|            |      |                               |            |                                                   |            |                                              |        |
|            | 1UUD | Cu(2)-O(1)                    | 1.897      | Cu(2)-O(1)                                        | 1.902      | Cu(2)-O(1)                                   | 1.898  |
|            |      | Cu(2)-N(1)                    | 2.000      | Cu(2)-N(1)                                        | 2.005      | Cu(2)-N(1)                                   | 2.003  |
|            |      | Br(3)-C(6)                    | 1.898      | Br(3)-C(6)                                        | 1.896      | Br(3)-C(6)                                   | 1.894  |
|            |      | Br(2)-C(9)                    | 1.889      | Br(2)-C(9)                                        | 1.893      | Br(2)-C(9)                                   | 1.908  |
|            |      |                               |            |                                                   |            |                                              |        |

ARTICLE
